# Supplementary material for: The role of inflammation in temporal shifts in the inflammatory bowel disease mucosal microbiome
Source: PubMed Central journal article supplement — Gut Microbes. 2018 Sep 5;9(6):477–85. doi: 10.1080/19490976.2018.1448742 (PMC6287691; doi:10.1080/19490976.2018.1448742), 2018-09-05
Supplement: kgmi-09-06-1448742-s001.pdf [file kgmi-09-06-1448742-s001.pdf]

### Supplementary Figure 1

Alpha diversity of samples (Shannon diversity indices). Comparisons between inflammation presence ((a) histologically confirmed; (b) endoscopic; (c) any inflammation), medication exposure ((d) IBD medications; (e) thiopurine; (f) antibiotics); (g) IBD subtype; (h) smoking status; (i) surgical history.

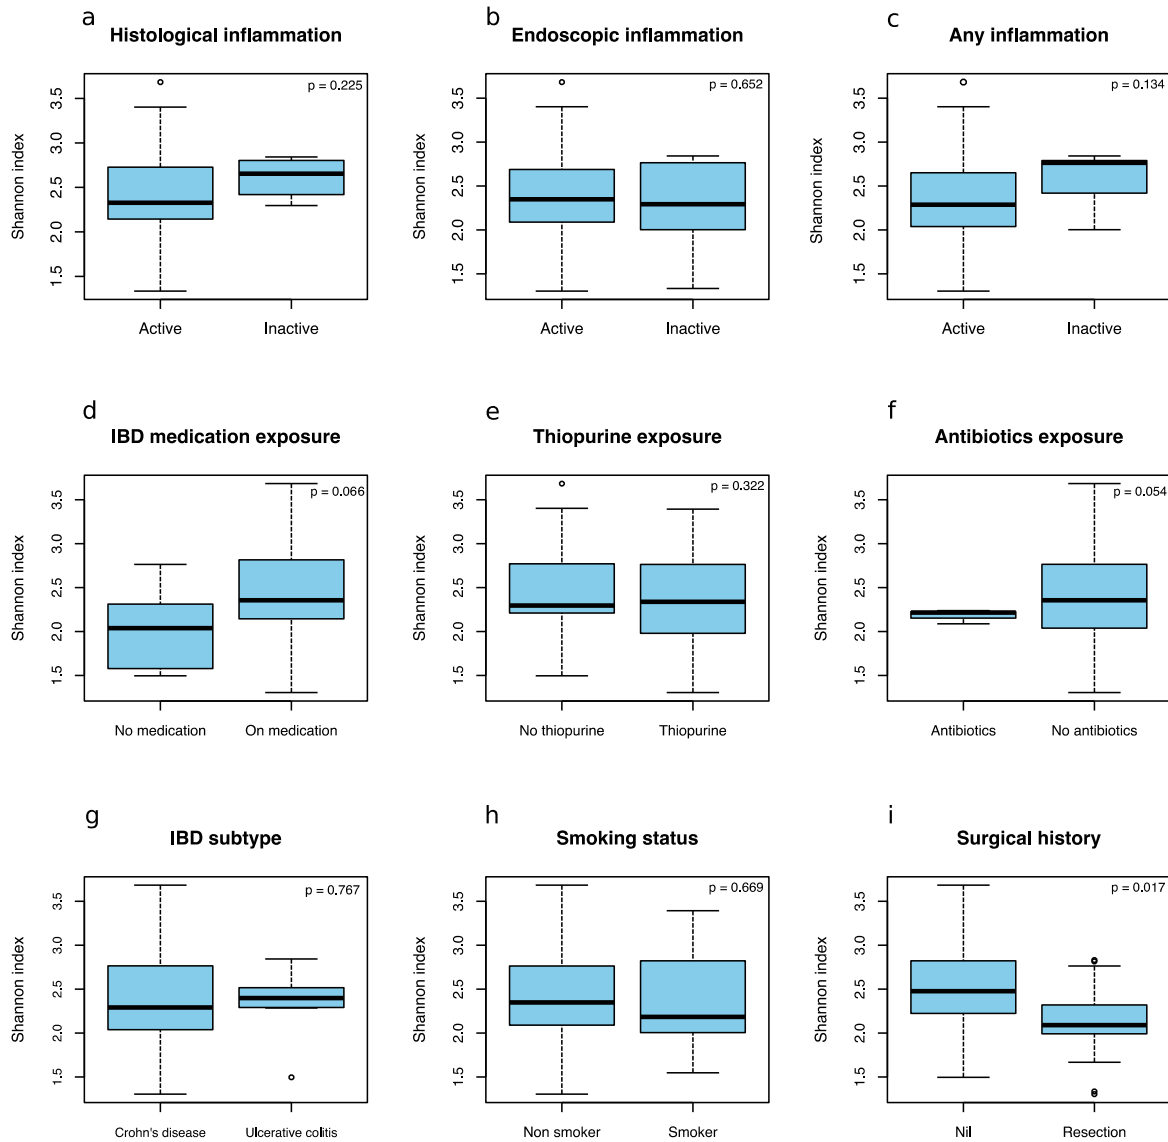

## Supplementary Figure 2

Relative abundance of the predominant bacterial phyla in samples according to A) the presence or absence of histologically confirmed inflammation; B) antibiotic exposure; C) smoking status; D) IBD subtype; and E) disease course.

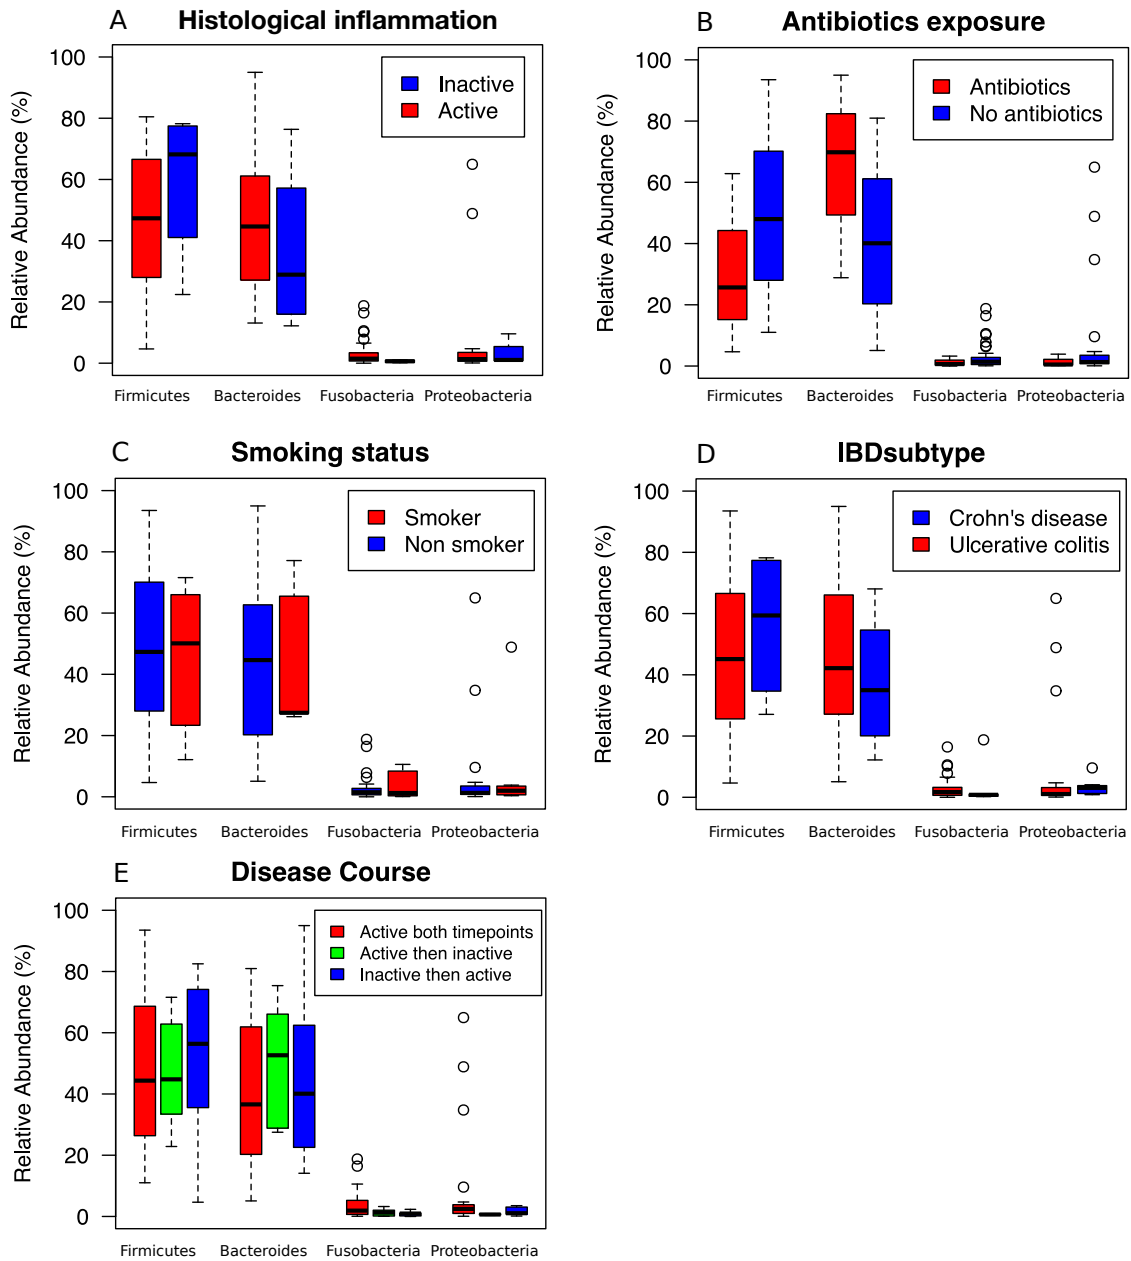

### Supplementary Figure 3

Relative abundances of inferred metagenomes, calculated using PICRUSt.

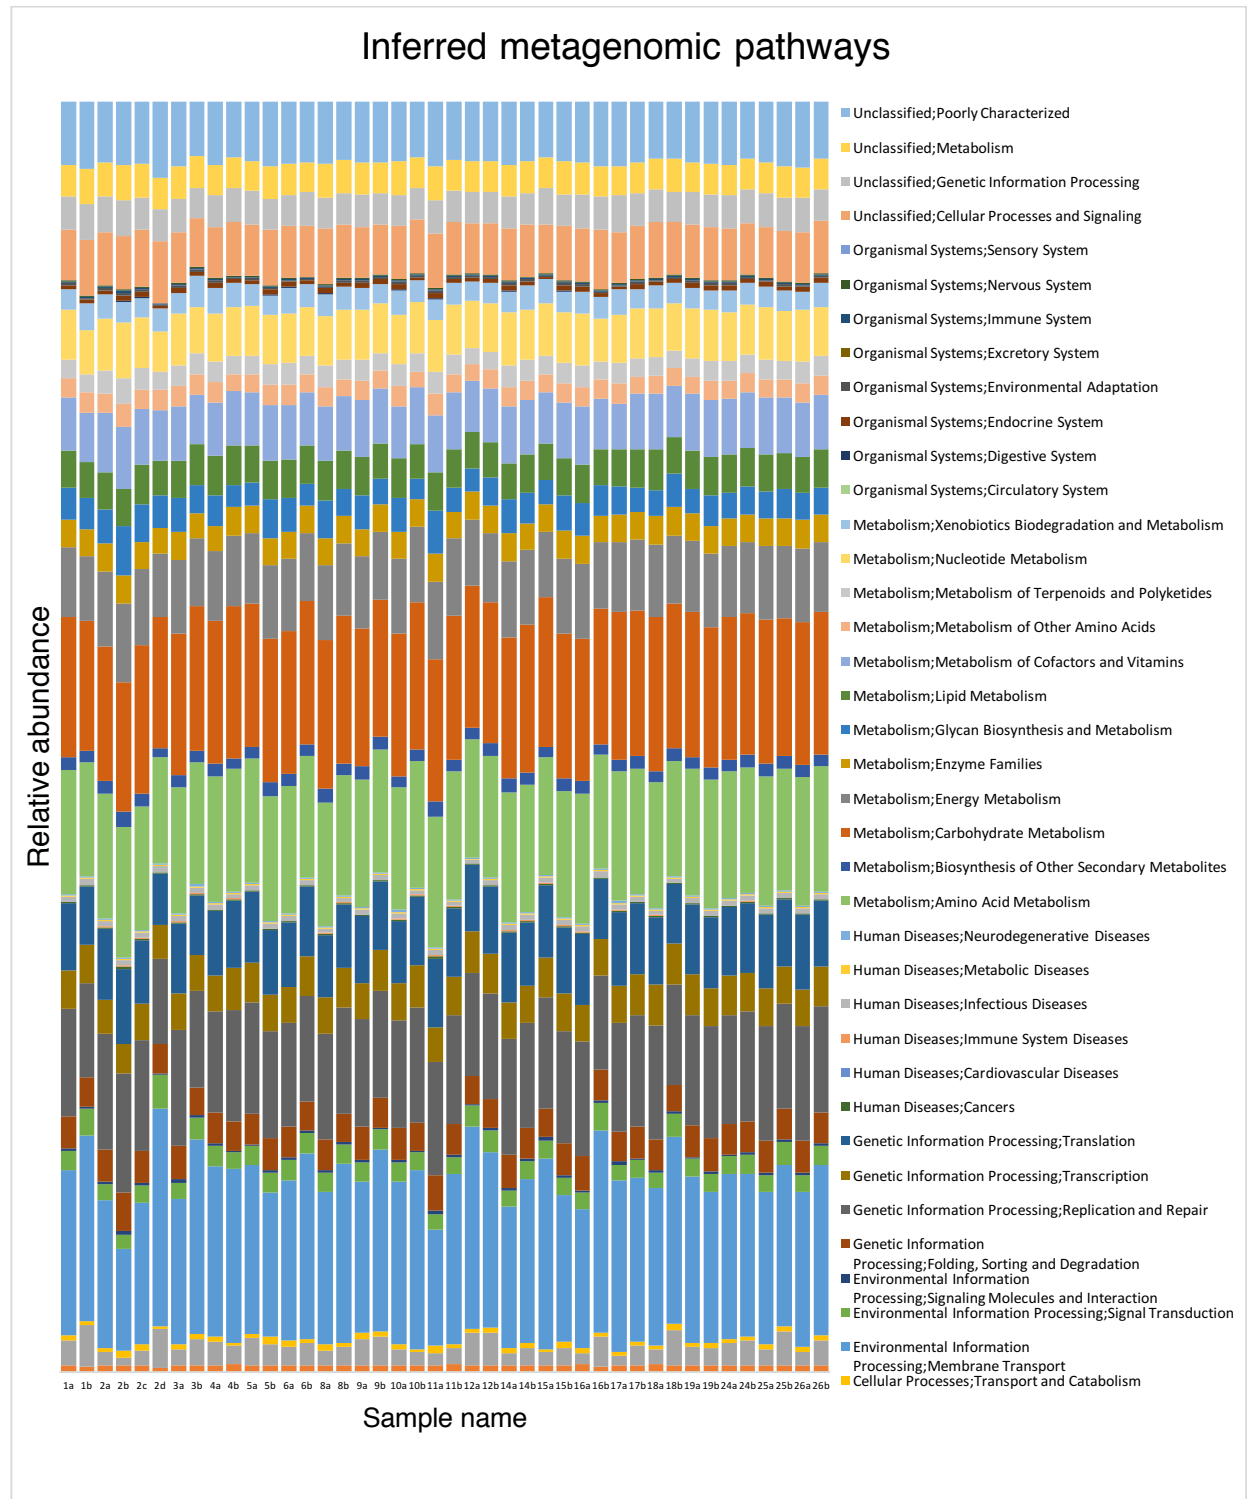

### Supplementary Figure 4

Bacteria with significantly different relative abundances. Determined by LDA (linear discriminant analysis) score cut-off of  $>1.0$ , Kruskal-Wallis test  $<0.05$ . More/less abundant means that a particular bacteria genus contributes significantly higher/lower percentage composition to the microbiome with respect to different clinical data.

**A:** Samples from patients with ulcerative colitis versus Crohn's disease (here bacteroides are significantly more abundant in samples from patients with ulcerative colitis versus Crohn's disease);  
**B:** Samples taken in the presence of active inflammation versus those initially active and subsequently inactive;  
**C:** Samples taken in the presence of active inflammation versus those initially inactive and subsequently active;  
**D:** Samples exposed to antibiotics versus those not exposed to antibiotics.

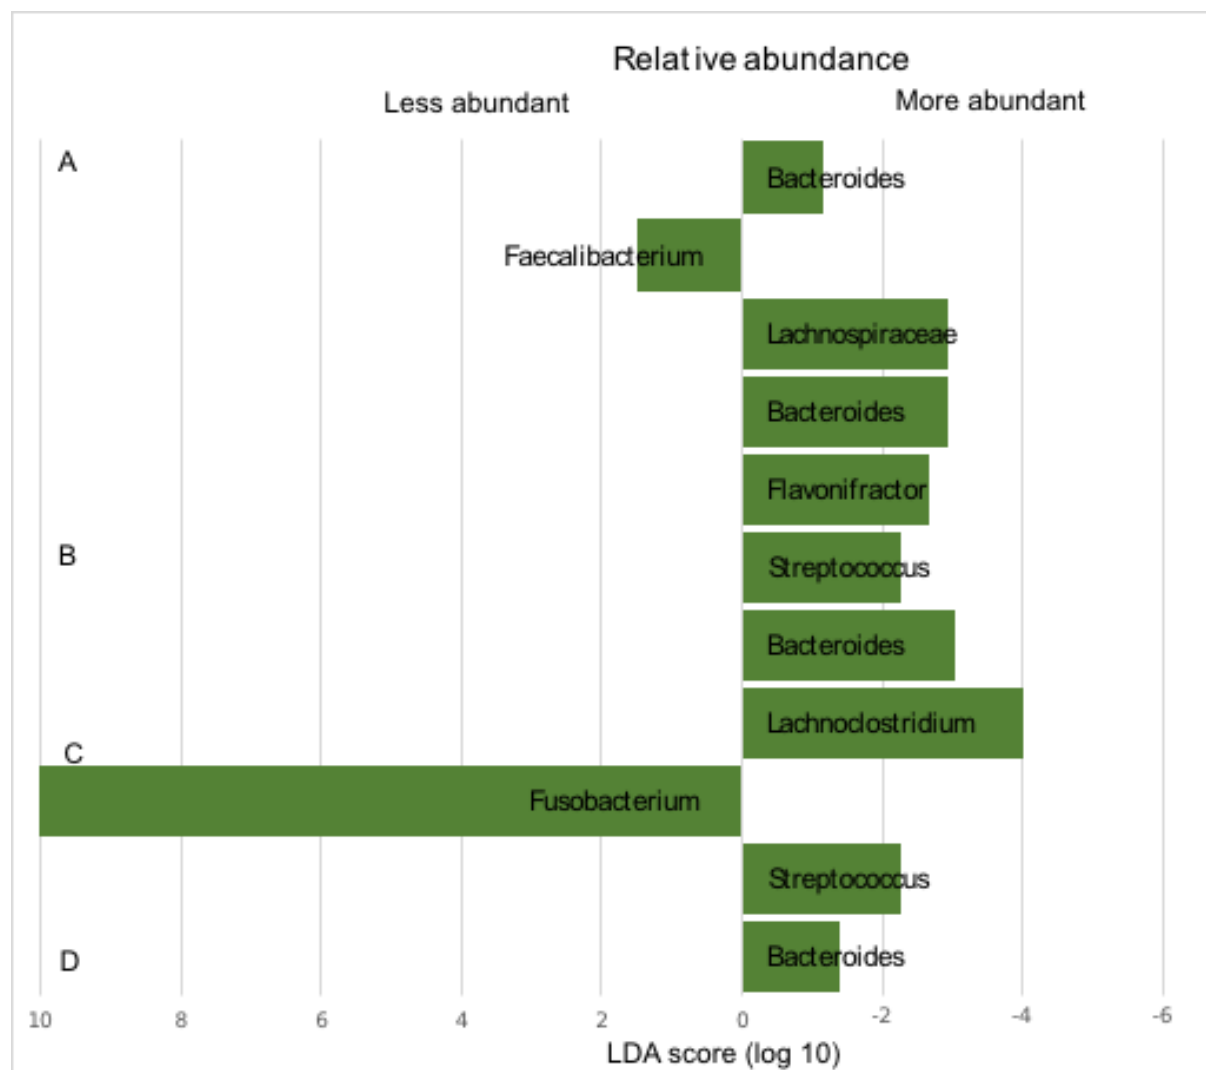

### Supplementary Table 1

Clinical information concerning the subjects. Montreal classification (for CD: behaviour B1= inflammatory, B2=stricturing, B3= penetrating, location L1= ileal, L2=colonic, L3= ileal and colonic, L4= upper GI; for UC severity S1=mild, S2=moderate, S3=severe; extent E1=proctitis, E2= rectum to splenic flexure, E3= pancolitis)

| Sample name | Sex    | IBD subtype | Montreal classification | Sample location  | Previous surgery | Endoscopic activity | Histological activity | Time between procedures (years) | Disease Length (years) | Smoking status | IBD medications        | Antibiotics    |
|-------------|--------|-------------|-------------------------|------------------|------------------|---------------------|-----------------------|---------------------------------|------------------------|----------------|------------------------|----------------|
| 1a          | Male   | CD          | B2, L3                  | Transverse colon | Nil              | Active              | NA                    |                                 | 5                      | Non smoker     | Infliximab, prednisone | No antibiotics |
| 1b          | Male   | CD          | B2, L3                  | Caecum           | Nil              | Active              | Active                | 1.9                             | 3                      | Non smoker     | Nil                    | No antibiotics |
| 2a          | Male   | CD          | B3, L3                  | Ascending colon  | Resection        | Inactive            | NA                    |                                 | 15.4                   | Non smoker     | Azathioprine           | No antibiotics |
| 2b          | Male   | CD          | B3, L3                  | Caecum           | Resection        | Active              | NA                    | 0.4                             | 15.7                   | Non smoker     | Azathioprine           | No antibiotics |
| 2c          | Male   | CD          | B3, L3                  | Caecum           | Resection        | Active              | NA                    |                                 | 16.6                   | Non smoker     | Azathioprine           | No antibiotics |
| 2d          | Male   | CD          | B3, L3                  | Terminal ileum   | Resection        | Inactive            | Active                | 0.7                             | 17.2                   | Non smoker     | Azathioprine           | No antibiotics |
| 3a          | Female | CD          | B1, L4                  | Terminal ileum   | Nil              | Active              | Active                |                                 | 4.3                    | Smoker         | Azathioprine           | No antibiotics |
| 3b          | Female | CD          | B1, L4                  |                  | Nil              | Active              | Active                | 1.3                             | 5.5                    | Smoker         | Azathioprine           | No antibiotics |
| 4a          | Male   | CD          | B3, L3                  | Colon            | Colectomy        | Active              | Active                |                                 | 16.6                   | Non smoker     | Sirolimus              | No antibiotics |
| 4b          | Male   | CD          | B3, L3                  | Colon            | Nil              | Active              | Active                | 1                               | 15.6                   | Non smoker     | Adalimumab             | No antibiotics |
| 5a          | Male   | CD          | B1, L3                  | Rectum           | Nil              | Active              | Active                |                                 | 30.6                   | Smoker         | Abatacept              | No antibiotics |
| 5b          | Male   | CD          | B1, L3                  | Rectum           | Nil              | Active              | Active                | 0.8                             | 31.4                   | Smoker         | Nil                    | No antibiotics |
| 6a          | Female | UC          | S3, E3                  | Rectum           | Nil              | Active              | Active                |                                 | 40.1                   | Non smoker     | Nil                    | No antibiotics |

|            |        |    |         |                 |           |          |          |     |      |            |                          |                |
|------------|--------|----|---------|-----------------|-----------|----------|----------|-----|------|------------|--------------------------|----------------|
| <b>6b</b>  | Female | UC | S3, E3  | Rectum          | Nil       | Inactive | Active   | 2.1 | 42.2 | Non smoker | Infliximab               | No antibiotics |
| <b>8a</b>  | Female | CD | B1p, L1 | Terminal ileum  | Resection | Inactive | Active   |     | 19.4 | Non smoker | Nil                      | No antibiotics |
| <b>8b</b>  | Female | CD | B1p, L1 | Caecum          | Resection | Inactive | NA       | 4.8 | 24.3 | Non smoker | Nil                      | No antibiotics |
| <b>9a</b>  | Female | CD | B1, L3  | Sigmoid colon   | Nil       | Active   | Inactive |     | 1.8  | Non smoker | Adalimumab               | No antibiotics |
| <b>9b</b>  | Female | CD | B1, L3  | Terminal ileum  | Nil       | Inactive | Active   | 5.9 | 7.7  | Non smoker | Nil                      | No antibiotics |
| <b>10a</b> | Male   | CD | B2, L3  | Ascending colon | Resection | Active   | NA       |     | 7.5  | Non smoker | Adalimumab               | No antibiotics |
| <b>10b</b> | Male   | CD | B2, L3  |                 | Resection | Active   | Active   | 1.6 | 9.1  | Non smoker | Adalimumab               | No antibiotics |
| <b>11a</b> | Female | CD | B2, L1  | Caecum          | Nil       | Inactive | Active   |     | 3.5  | Smoker     | Infliximab               | No antibiotics |
| <b>11b</b> | Female | CD | B2, L1  | Terminal ileum  | Resection | Active   | NA       | 4   | 7.5  | Smoker     | Nil                      | No antibiotics |
| <b>12a</b> | Male   | CD | B2p, L3 | Sigmoid colon   | Nil       | Active   | Active   |     | 9.9  | Smoker     | Nil                      | No antibiotics |
| <b>12b</b> | Male   | CD | B2p, L3 | Terminal ileum  | Nil       | Active   | Active   | 5.8 | 15.7 | Smoker     | Azathioprine             | No antibiotics |
| <b>14a</b> | Female | CD | B2, L1  | Terminal ileum  | Resection | Active   | Active   |     | 14   | Non smoker | Azathioprine, adalimumab | Antibiotics    |
| <b>14b</b> | Female | CD | B2, L1  | Rectum          | Resection | Inactive | Inactive | 0.6 | 14.6 | Non smoker | Nil                      | No antibiotics |
| <b>15a</b> | Female | CD | B2, L1  | Terminal ileum  | Resection | Inactive | Active   |     | 12.7 | Non smoker | Nil                      | Antibiotics    |
| <b>15b</b> | Female | CD | B2, L1  | Terminal ileum  | Resection | Active   | Active   | 1.7 | 14.4 | Non smoker | Nil                      | No antibiotics |
| <b>16a</b> | Female | CD | B2p, L3 | Ascending colon | Nil       | Active   | Active   |     | 5.5  | Non smoker | Adalimumab               | Antibiotics    |

|            |        |    |           |                  |           |          |          |     |      |            |                              |                |
|------------|--------|----|-----------|------------------|-----------|----------|----------|-----|------|------------|------------------------------|----------------|
| <b>16b</b> | Female | CD | B2p, L3   | Terminal ileum   | Resection | Active   | Active   | 1.9 | 7.3  | Non smoker | Adalimumab                   | No antibiotics |
| <b>17a</b> | Male   | UC | S1, E3    | Ascending colon  | Nil       | Active   | Active   |     | 0    | Non smoker | Nil                          | No antibiotics |
| <b>17b</b> | Male   | UC | S1, E3    | Ascending colon  | Nil       | Active   | Active   | 3.4 | 3.4  | Non smoker | 6-mercaptopurine, prednisone | No antibiotics |
| <b>18a</b> | Male   | CD | B2, L3 L4 | Caecum           | Nil       | Inactive | NA       |     | 8.7  | Non smoker | Azathioprine                 | No antibiotics |
| <b>18b</b> | Male   | CD | B2, L3 L4 | Caecum           | Resection | Inactive | Active   | 0.8 | 9.5  | Non smoker |                              | No antibiotics |
| <b>19a</b> | Female | UC | S1, E3    | Caecum           | Nil       | Inactive | Inactive |     | 8.2  | Non smoker | Mesalazine                   | No antibiotics |
| <b>19b</b> | Female | UC | S1, E3    | Caecum           | Nil       | Active   | Active   | 1.7 | 19.9 | Non smoker | Mesalazine                   | No antibiotics |
| <b>24a</b> | Female | CD | B2, L2    | Terminal ileum   | Nil       | Inactive | Active   |     | 25.5 | Non smoker | Azathioprine                 | No antibiotics |
| <b>24b</b> | Female | CD | B3, L2    | Terminal ileum   | Nil       | Active   | Active   | 3.3 | 22.2 | Non smoker | Azathioprine                 | No antibiotics |
| <b>25a</b> | Female | CD | B1, L2    | Caecum           | Nil       | Active   | Active   |     | 3.9  | Non smoker | Nil                          | No antibiotics |
| <b>25b</b> | Female | CD | B2, L2    | Transverse colon | Nil       | Active   | Active   | 4.7 | 8.6  | Non smoker | Azathioprine, prednisone     | No antibiotics |
| <b>26a</b> | Female | UC | S2, E2    | Ascending colon  | Nil       | Active   | Active   |     | 12.6 | Non smoker | Mesalazine                   | No antibiotics |
| <b>26b</b> | Female | UC | S3, E2    | Terminal ileum   | Nil       | Inactive | Inactive | 2.9 | 15.4 | Non smoker | Mesalazine                   | No antibiotics |

**Supplementary Table 2**

Intra-sample microbial diversity comparisons (alpha diversity) in relation to inflammation, disease type, smoking status, disease duration, exposure to IBD medications and previous intestinal surgery. SD is the Shannon diversity index. Not all samples were included in this analysis as one sample had only 329 sequences, and histopathology reports were only available for 33 samples.

| <b>Comparison</b>                     | <b>Group 1</b>      | <b>N=</b> | <b>Group 2</b>      | <b>N=</b> | <b>Mean SD Group 1</b> | <b>Mean SD Group 2</b> | <b>P value (ANOVA)</b> |
|---------------------------------------|---------------------|-----------|---------------------|-----------|------------------------|------------------------|------------------------|
| Histologically confirmed inflammation | Active inflammation | 29        | No inflammation     | 4         | 2.423                  | 2.634                  | 0.225                  |
| Disease type                          | Crohn's disease     | 33        | Ulcerative colitis  | 8         | 2.379                  | 2.343                  | 0.767                  |
| Smoking                               | Active smokers      | 8         | Non smokers         | 33        | 2.370                  | 2.372                  | 0.669                  |
| Disease duration                      | >4 years            | 35        | <4 years            | 6         | 2.384                  | 2.299                  | 0.825                  |
| Treatment effect                      | On treatment        | 34        | No treatment        | 7         | 2.446                  | 2.011                  | 0.066                  |
| Surgery                               | Previous surgery    | 15        | No previous surgery | 26        | 2.083                  | 2.510                  | 0.017                  |



### Supplementary Table 3

Differences in relative abundance of bacterial taxa based on clinical subtypes (metastats). Phylogenetic placement given by Silva reference database. OTUs included if overall relative abundance >0.1%. P values were adjusted using the Benjamini-Hochberg method.

| <b>Subset compared</b>                 | <b>Base group mean (%)</b> | <b>p-value</b> | <b>adjusted p-value</b> | <b>log2fold change</b> | <b>Taxonomic classification (OTU number)</b> |                     |
|----------------------------------------|----------------------------|----------------|-------------------------|------------------------|----------------------------------------------|---------------------|
| Crohn's disease and ulcerative colitis | 8.99                       | 0.033          | 0.1648                  | -1.16                  | Bacteroides (OTU 1)                          |                     |
|                                        | 3.39                       | 0.011          | 0.1177                  | 1.5                    | Faecalibacterium (OTU 2)                     |                     |
|                                        | 4.584                      | 0.04           | 0.1691                  | -2.28                  | Lachnospiraceae (OTU 10)                     |                     |
|                                        | 0.0793                     | 0.011          | 0.1177                  | -3.89                  | Lachnoclostridium (OTU 17)                   |                     |
|                                        | 0.2733                     | 0.032          | 0.1648                  | -2.47                  | Lachnoclostridium (OTU 19)                   |                     |
|                                        | 0.1234                     | 0.03           | 0.1648                  | -2.83                  | Lachnoclostridium (OTU 21)                   |                     |
|                                        | 0                          | 0.029          | 0.1648                  |                        | Parasutterella (OTU 24)                      |                     |
|                                        | 0                          | 0.002          | 0.0824                  |                        | Lachnospiraceae (OTU 26)                     |                     |
|                                        | 0.1146                     | 0.015          | 0.1177                  | -2.95                  | Bacteroides (OTU 29)                         |                     |
|                                        | 0                          | 0.003          | 0.0824                  |                        | Parabacteroides (OTU 33)                     |                     |
|                                        | 0.097                      | 0.014          | 0.1177                  | -2.66                  | Flavonifractor (OTU 34)                      |                     |
|                                        | 0                          | 0.005          | 0.0916                  |                        | Phascolarctobacterium (OTU 40)               |                     |
|                                        | 0.0264                     | 0.036          | 0.1648                  | -3.19                  | Lachnoclostridium (OTU 49)                   |                     |
| Active-inactive and active-active      |                            | 0.025          |                         |                        |                                              |                     |
|                                        | 0.5289                     | 3              | 0.3479                  | -2.37                  | Streptococcus (OTU 5)                        |                     |
|                                        |                            | 0.001          |                         |                        |                                              |                     |
|                                        | 0.1528                     | 8              | 0.1017                  | -3.05                  | Bacteroides (OTU 14)                         |                     |
|                                        | 0.0588                     | 0.004          | 0.1087                  | -4                     | Lachnoclostridium (OTU 21)                   |                     |
|                                        | 0.011                      |                |                         |                        |                                              |                     |
|                                        | 0.094                      | 7              | 0.2145                  | -1.86                  | Streptococcus (OTU 44)                       |                     |
|                                        | 0.476                      | 0.031          | 0.4258                  | -2.52                  | Streptococcus (OTU 5)                        |                     |
| Inactive-active and active-active      | 8.5949                     | 0.006          | 0.1648                  | 10.11                  | Fusobacterium (OTU 7)                        |                     |
|                                        | 0.141                      | 0.023          | 0.4212                  | -2.27                  | Streptococcus (OTU 32)                       |                     |
|                                        | 0                          | 0.003          | 0.1648                  |                        | Tyzzarella_4 (OTU 59)                        |                     |
| No antibiotics and antibiotics         | 16.0623                    | 0.000          | 1                       | 0.0074                 | -1.38                                        | Bacteroides (OTU 1) |
